# Supplementary material for: Machine Learning Meta-analysis of Large Metagenomic Datasets: Tools and Biological Insights
Source: PLOS journal article supplement (doi:10.1371/journal.pcbi.1004977), 2016-07-11
Supplement: S2 (10.1371/journal.pcbi.1004977.s002) [file journal.pcbi.1004977.s002]

| Training on | AUC on WT2D | IntCorr |
|-------------|-------------|---------|
| T2D_stageI  | 0.585       | 0.575   |
| T2D_stageII | 0.689       | 0.624   |
| T2D         | 0.664       | 0.628   |
